# Supplementary material for: An Evaluation of the Hygiene Practices of Polish Street Food Vendors in Selected Food Trucks and Stands
Source: MDPI journal article supplement (doi:10.3390/foods10112640), 2021-10-31
Supplement: s1 [file s1]

**Table S1.** Questionnaire structure

| Number   | Questions *                                                                                               | Compliances with Hygienic Rules (Yes or No) |
|----------|-----------------------------------------------------------------------------------------------------------|---------------------------------------------|
| <b>1</b> | <b>Section 1: Sanitary conditions of food production</b>                                                  |                                             |
| Q.1.1.   | Is the production area hygienic?                                                                          |                                             |
| Q.1.2.   | Are the production processes functional (dirty operations are separated from clean) at the facility?      |                                             |
| Q.1.3.   | Is there a waste bin in the production area and is it overflowing?                                        |                                             |
| Q.1.4.   | Is the floor in a good condition (clean, undamaged, easy to wash and disinfect)?                          |                                             |
| Q.1.5    | Are the production tops clean, smooth and made of a material that is easy to clean and disinfect?         |                                             |
| Q.1.6    | Are the facility walls clean, washable, non-absorbent and non-toxic?                                      |                                             |
| Q.1.7    | Is there a system of air ventilation at the facility?                                                     |                                             |
| Q.1.8    | Are there any food pests in the production area? (visually determined)                                    |                                             |
| Q.1.9    | Is the GHP implementation possible at the facility?                                                       |                                             |
| Q.1.10   | Is it possible to clean/disinfect the equipment?                                                          |                                             |
| Q.1.11   | Are there no personal items (phone, bag) in the production area?                                          |                                             |
| <b>2</b> | <b>Section 2: Hygiene of processes of food production and distribution</b>                                |                                             |
| Q.2.1    | Are the working places in a good hygienic condition?                                                      |                                             |
| Q.2.2    | Is the food separated from the consumer in a way that excludes a secondary contamination?                 |                                             |
| Q.2.3    | Are the packages, tableware clean, in a good condition and in a storage disabling their contamination?    |                                             |
| Q.2.4    | Are the raw materials stored in a proper temperature?                                                     |                                             |
| Q.2.5    | Is there a separation of raw material and final products?                                                 |                                             |
| Q.2.6    | Are the ready-to-eat products and waste in separation?                                                    |                                             |
| Q.2.7    | Is there a separation of catering equipment during the preparation and distribution of meals?             |                                             |
| Q.2.8    | Is the catering equipment clean and in a good condition (visually determined)?                            |                                             |
| Q.2.9    | Is there a space for returning tableware or a waste bin for the disposable tableware?                     |                                             |
| Q.2.10   | Are there no unauthorized people in the production areas?                                                 |                                             |
| Q.2.11   | Is the quality of semi-finished and ready-to-eat products satisfying (freshness visually determined)?     |                                             |
| Q.2.12   | Are there no production activities where the clean and dirty areas may cross one another?                 |                                             |
| Q.2.13   | Do workers handle packaging, disposable plates and cutlery hygienically?                                  |                                             |
| <b>3</b> | <b>Section 3: Personal hygiene of staff</b>                                                               |                                             |
| Q.3.1    | Does the employee have clean hands during work?                                                           |                                             |
| Q.3.2    | Does the worker have clean, short, unpainted and natural (no tips) nails?                                 |                                             |
| Q.3.3    | Does the worker not wear hand jewelry during work?                                                        |                                             |
| Q.3.4    | Is there a correct treatment and protection of the injuries of hands?                                     |                                             |
| Q.3.5    | Do workers comply with no-drinking and no-eating rules in the production/ distribution area?              |                                             |
| Q.3.6    | Do workers have correct working clothes?                                                                  |                                             |
| Q.3.7    | Is the personal clothing protection covering all of the worker's personal clothing?                       |                                             |
| Q.3.8    | Is the worker washing his hands properly and frequently (during the observation)?                         |                                             |
| Q.3.9    | Is the worker drying hands after washing correctly (during the observation of his work)?                  |                                             |
| Q.3.10   | Is there a sink for washing hands with instruction of hand washing & disinfection in the production area? |                                             |

---

|        |                                                                                             |
|--------|---------------------------------------------------------------------------------------------|
| Q.3.11 | Are there all of the proper accessories near the sink (i.e. soap, paper towels, waste bin)? |
| Q.3.12 | Is taking fees properly separated from the production ?                                     |
| Q.3.13 | Do workers have and change disposable gloves frequently enough?                             |
| Q.3.14 | Does the staff have a clean hair?                                                           |
| Q.3.15 | Is the staff covering their hair during food work?                                          |
| Q.3.16 | Are workers protecting their long hair (thus minimalizing the risk of food contamination)?  |
| Q.3.17 | Do workers have personal clothing items in addition to working clothes?                     |
| Q.3.18 | Does the worker not have earrings or other accessories on his head during food work?        |
| Q.3.19 | Does the staff not have skin problems of the head?                                          |
| Q.3.20 | Does the staff not have an illness (cough, sneeze) that makes hygienic work difficult?      |
| Q.3.21 | Does the staff not have excessive make-up?                                                  |
| Q.3.22 | Are the workers not touching their face, hair, nose, or ears during food production?        |

---

\* References to criteria of assessment regarding Regulation (EC) 852/2004.
